# Supplementary material for: Design, Synthesis, and Evaluation of Linker-Optimised PSMA-Targeting Radioligands
Source: MDPI journal article supplement (doi:10.3390/pharmaceutics14051098), 2022-05-20
Supplement: s1 [file s1]

## Supplementary Material

# Design, Synthesis, and Evaluation of Linker Optimised PSMA-targeting Radioligands

Fanny Lundmark <sup>1</sup>, Gustav Olanders <sup>1</sup>, Sara Sophie Rinne <sup>1</sup>, Ayman Abouzayed <sup>1</sup>, Anna Orlova <sup>1,2,†</sup>, and Ulrika Rosenström <sup>1,\*,‡</sup>

<sup>1</sup> Department of Medicinal Chemistry, Uppsala University, 751 23 Uppsala, Sweden; fanny.lundmark@ilk.uu.se (F.L.); gustav.olanders@ilk.uu.se (G.O.) sara.rinne@ilk.uu.se (S.S.R.); ayman.abouzayed@ilk.uu.se (A.A.); anna.orlova@ilk.uu.se (A.O.); ulrika.rosenstrom@ilk.uu.se (U.R.)

<sup>2</sup> Science for Life Laboratory, Department of Medicinal Chemistry, Uppsala University, 751 23 Uppsala

\* Correspondence: Ulrika.rosenstrom@ilk.uu.se

† Equal contribution

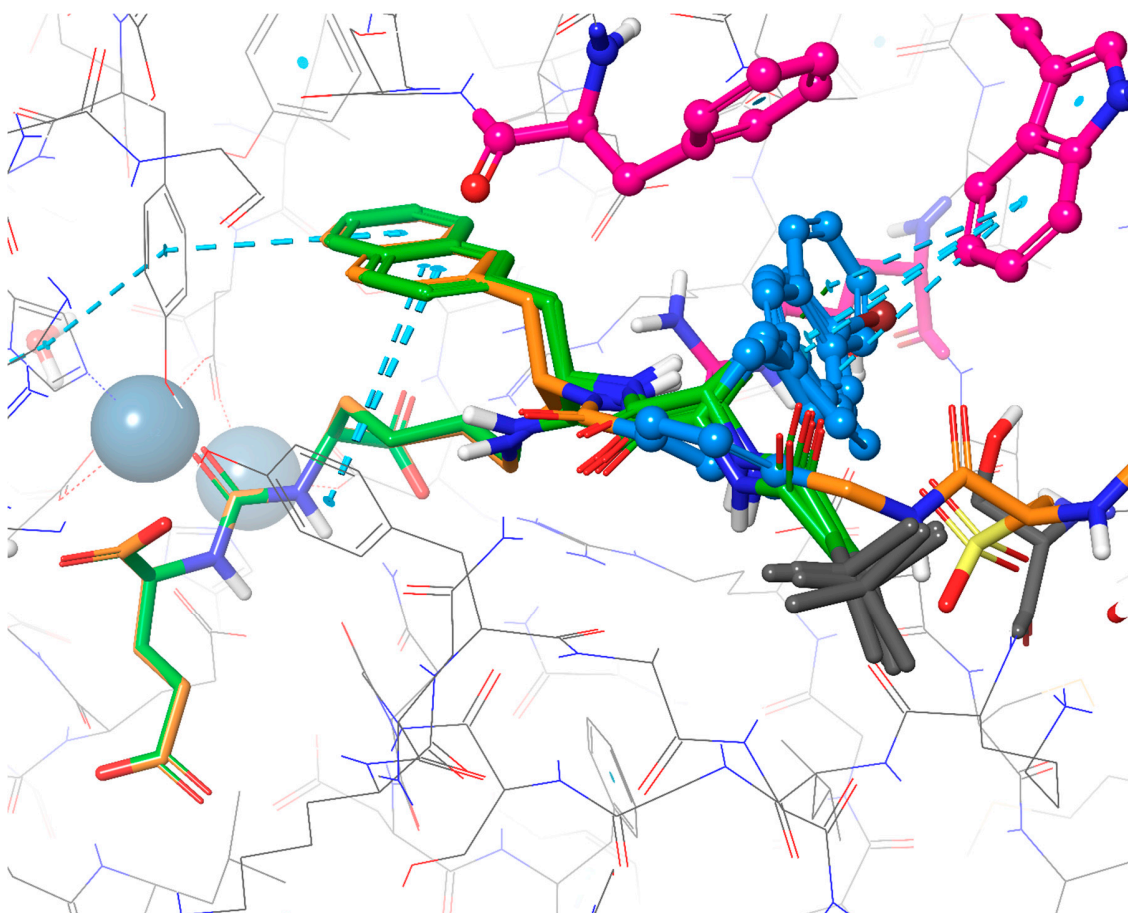

Figure S1. Overlay of the PSMA-1027 X-ray structure (orange) and the suggested binding mode of BQ7857-61 depicted in green with SET 2 changes highlighted in blue. Amino acids Phe546, Trp541, and Arg463 forming subpocket 2 are highlighted in pink. PDB code 5O5U.

**Figure S2–S12: Chemical structure and mass-spectroscopy (MS) chromatogram of BQ7837-41 and BQ7857-62, and radio-HPLC chromatogram of [<sup>111</sup>In]In-BQ7837-41 and [<sup>111</sup>In]In-BQ7857-62**

*BQ7837*

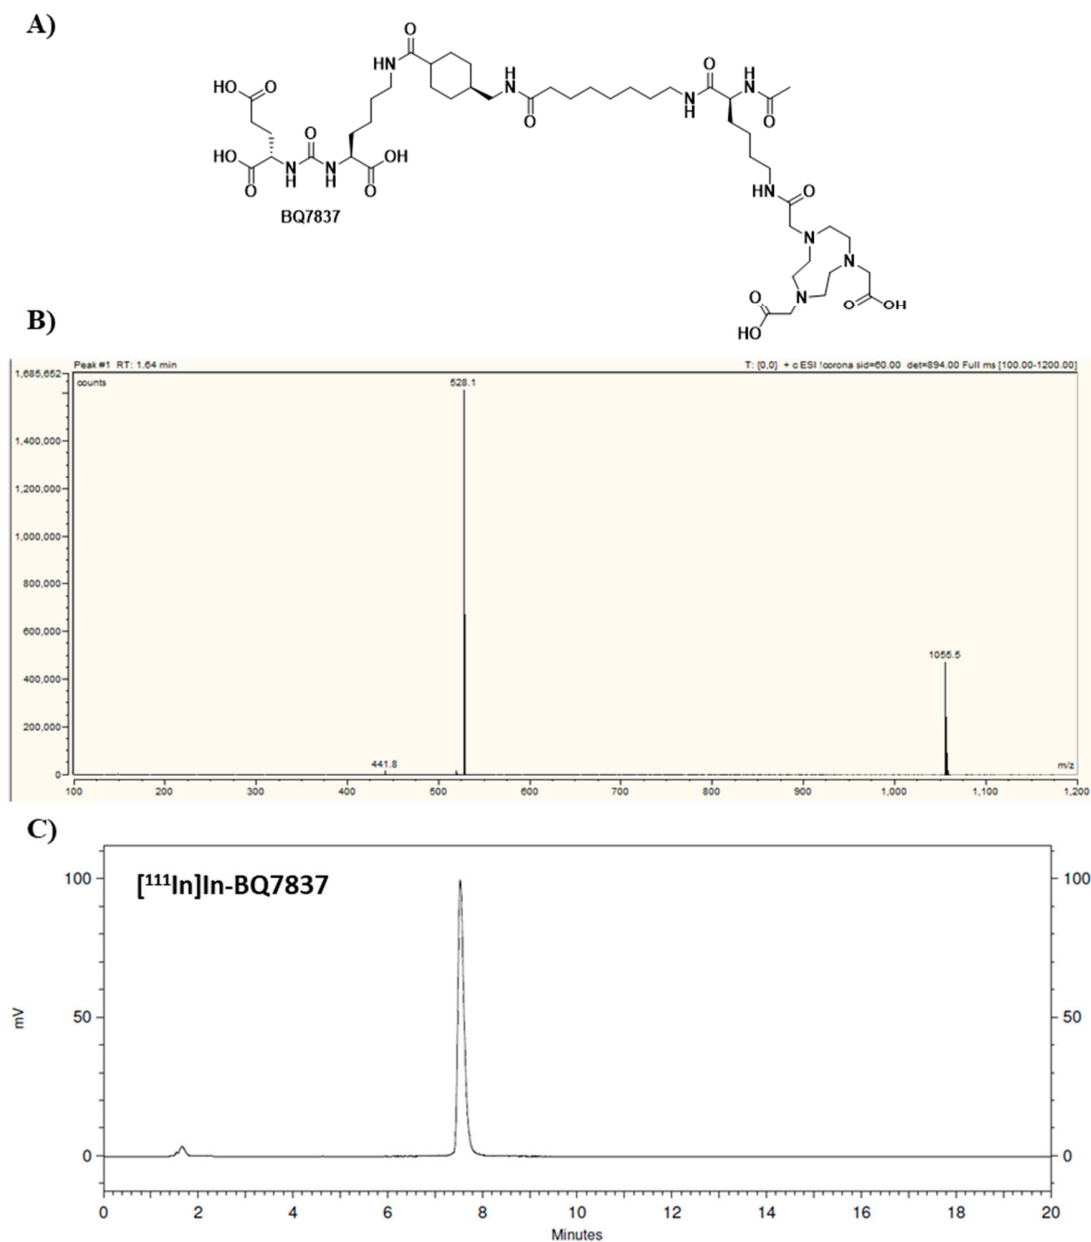

*Figure S2. A) Chemical structure of BQ7837, B) MS-chromatogram with observed  $[M+H]^+ = 1055.4$  and  $[M+2H]^{2+} = 528.1$ , C) radio-HPLC chromatogram of [<sup>111</sup>In]In-BQ7837 demonstrating pure product.*

BQ7838

A)

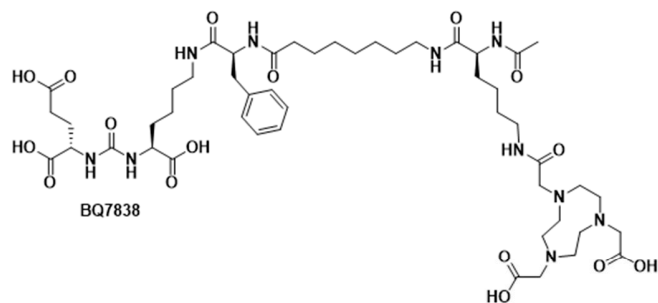

B)

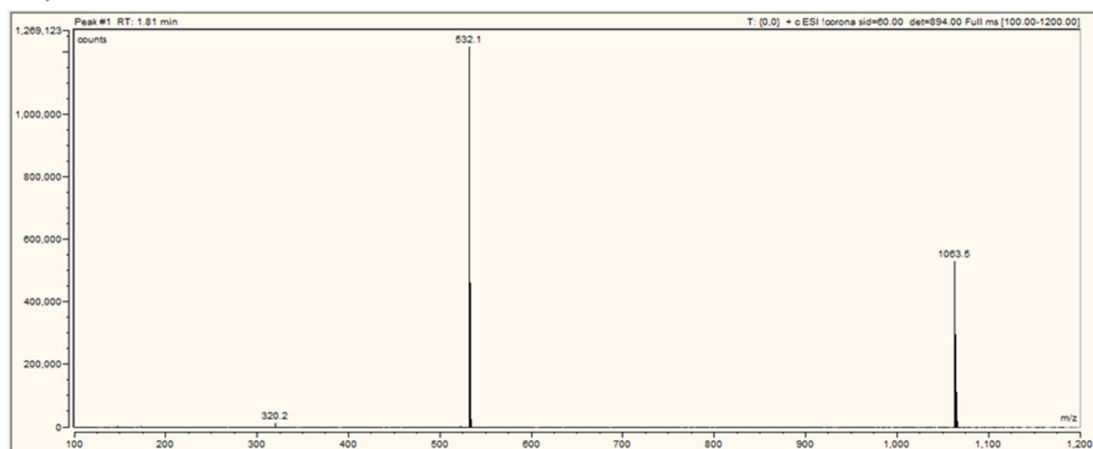

C)

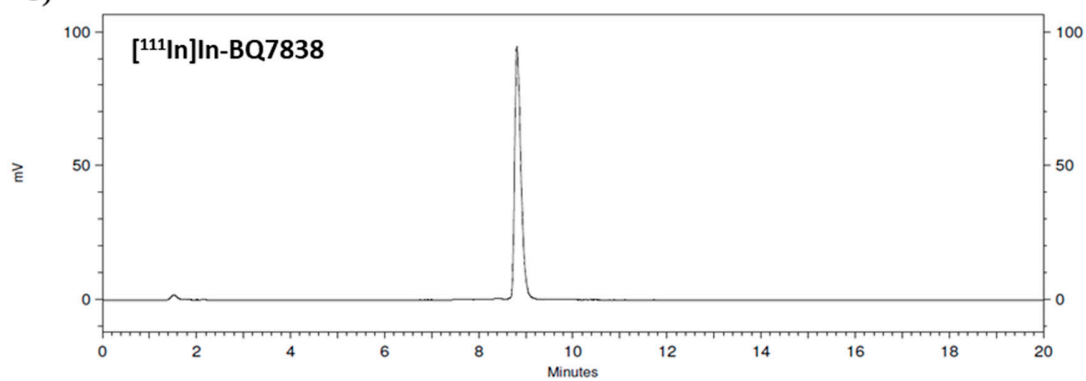

Figure S3. A) Chemical structure of BQ7838, B) MS-chromatogram with observed  $[M+H]^+ = 1063.3$  and  $[M+2H]^{2+} = 532.2$ , C) radio-HPLC chromatogram of  $[^{111}\text{In}]\text{In-BQ7838}$  demonstrating pure product.

BQ7839

A)

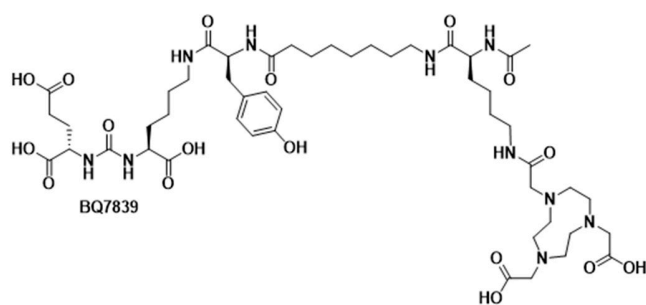

B)

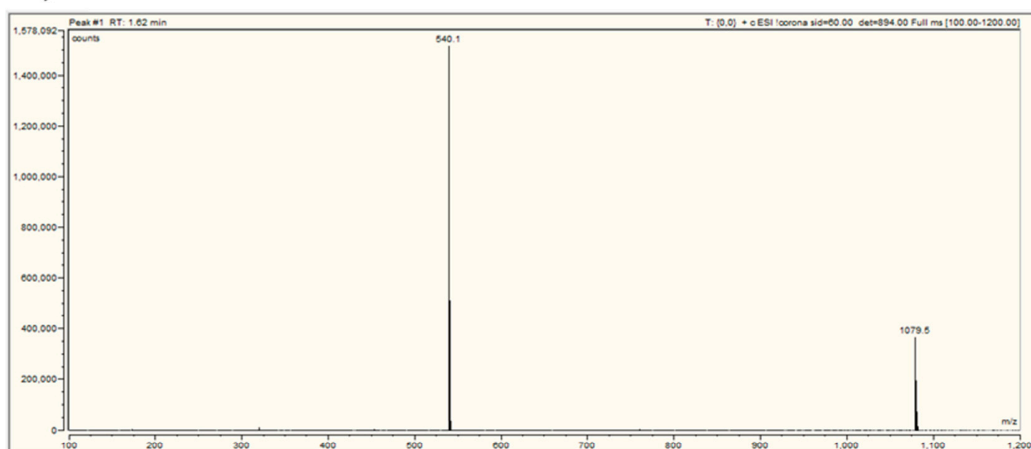

C)

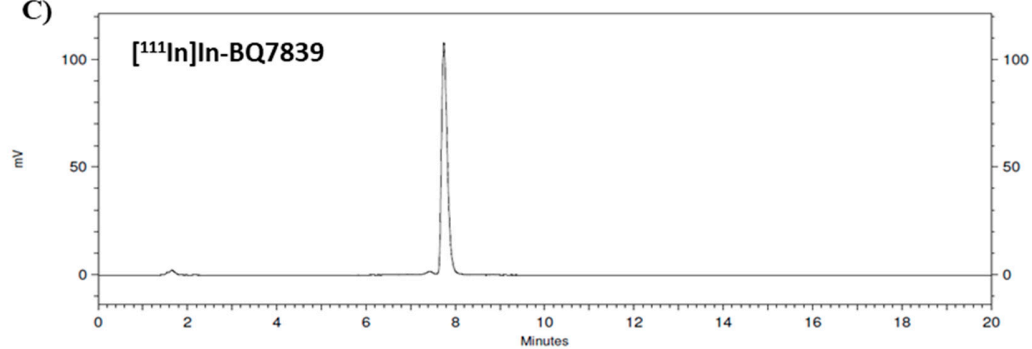

Figure S4. A) Chemical structure of BQ7839, B) MS-chromatogram with observed  $[M+H]^+ = 1079.4$  and  $[M+2H]^{2+} = 540.1$ , C) radio-HPLC chromatogram of  $[^{111}\text{In}]\text{In-BQ7839}$  demonstrating pure product.

BQ7840

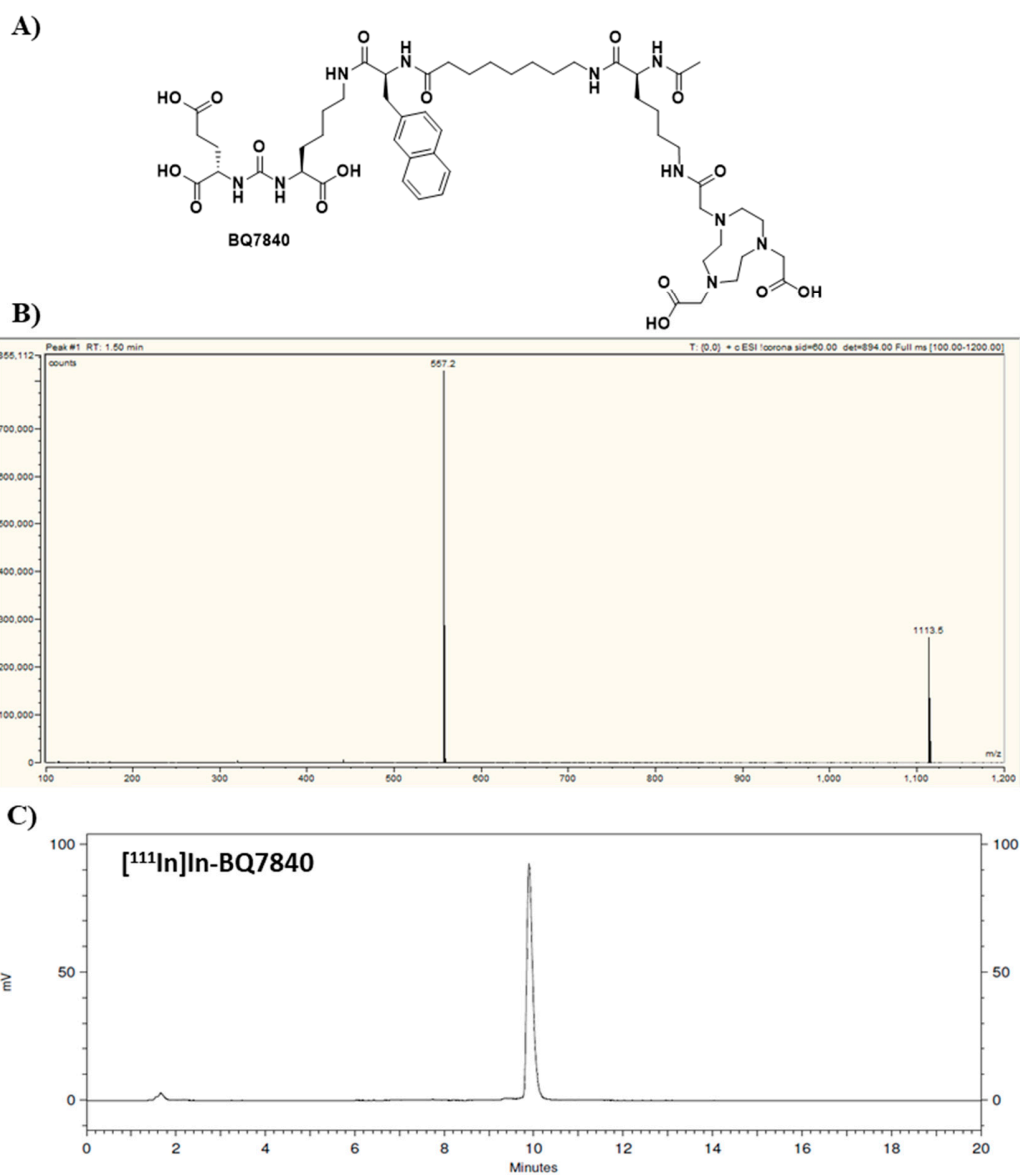

Figure S5. A) Chemical structure of BQ7840, B) MS-chromatogram with observed  $[M+H]^+ = 1113.3$  and  $[M+2H]^{2+} = 557.1$ , C) radio-HPLC chromatogram of  $[^{111}\text{In}]\text{In-BQ7840}$  demonstrating pure product

BQ7841

A)

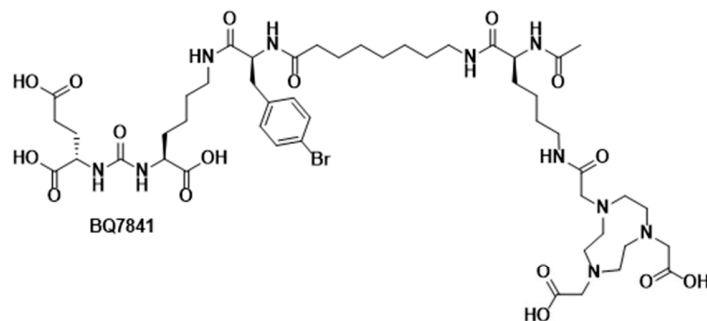

B)

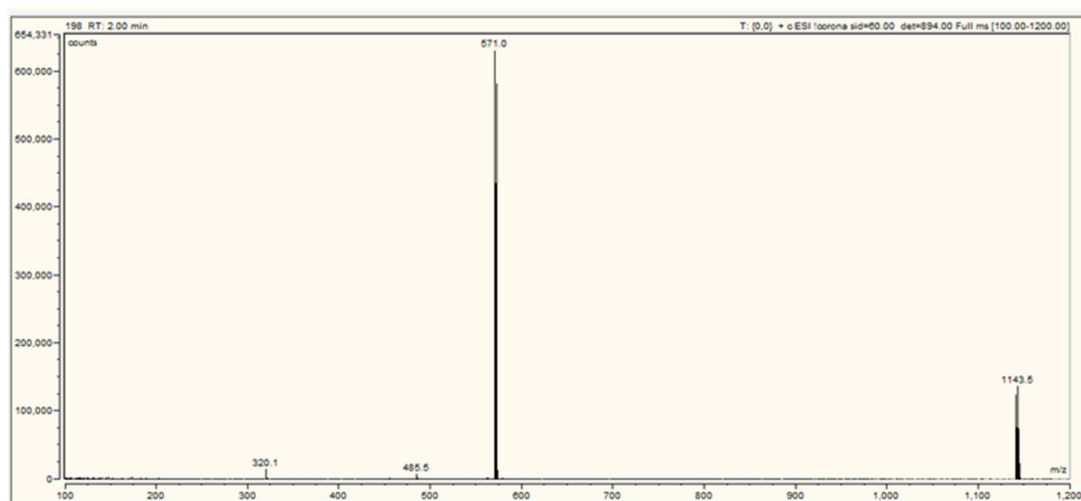

C)

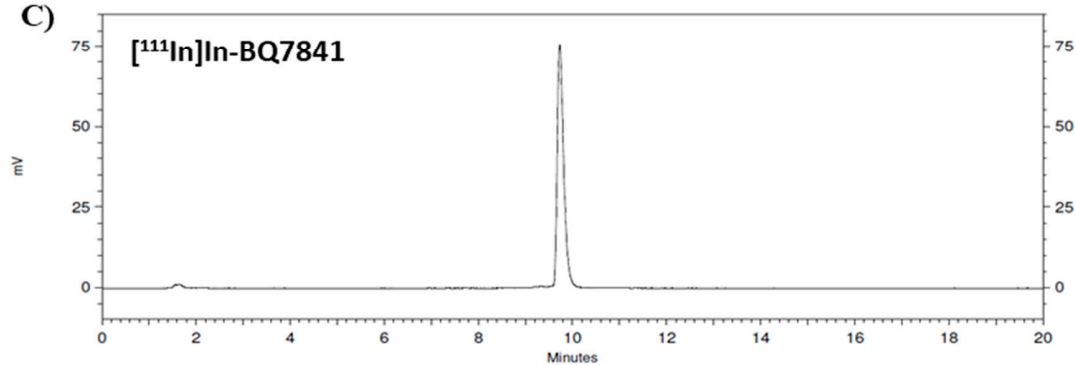

Figure S6. A) Chemical structure of BQ7841, B) MS-chromatogram with observed  $[M+H]^+ = 1141.1/1143.3$  and  $[M+2H]^{2+} = 571.0/572.0$  (bromine isotope pattern), C) radio-HPLC chromatogram of  $[^{111}\text{In}]\text{In-BQ7841}$  demonstrating pure product.

BQ7857

A)

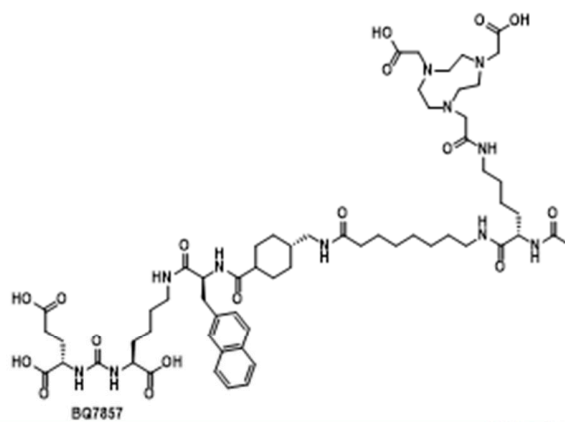

B)

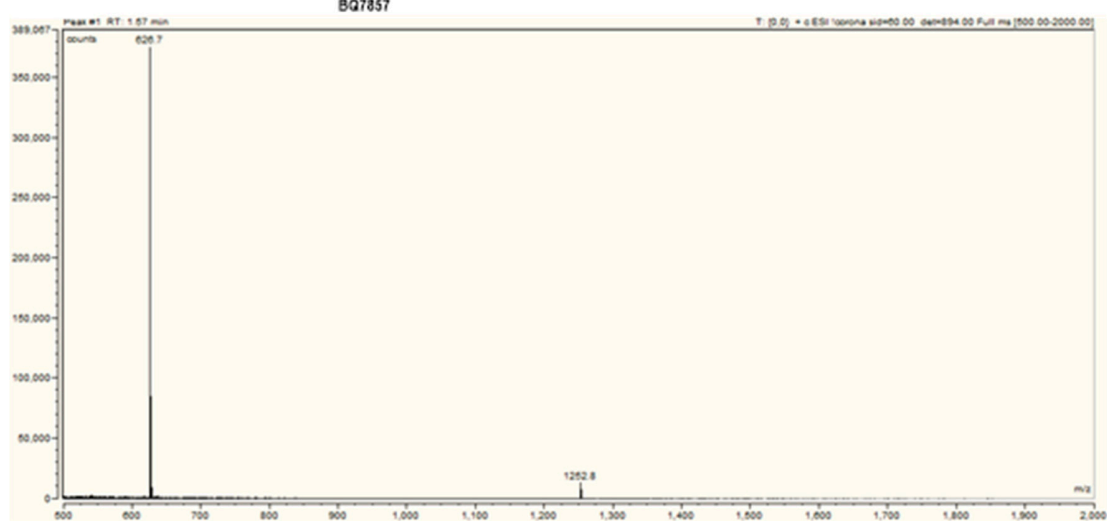

C)

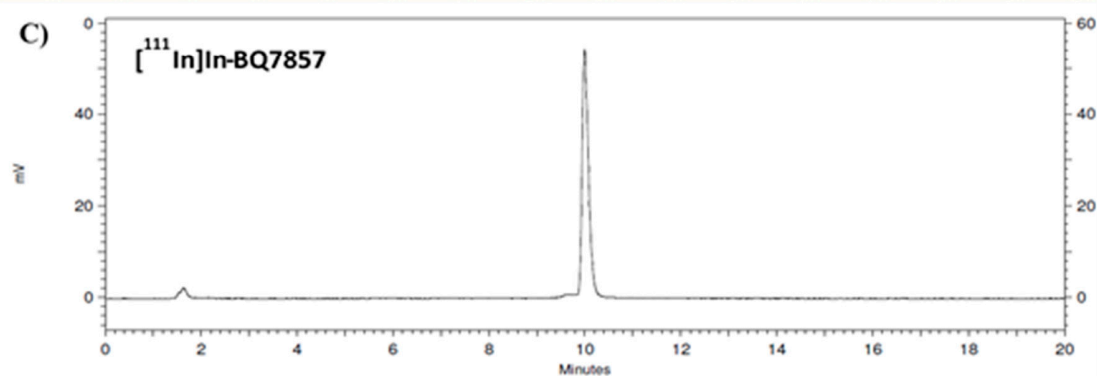

Figure S7. A) Chemical structure of BQ7857, B) MS-chromatogram with observed  $[M+H]^+ = 1252.8.3$  and  $[M+2H]^{2+} = 626.7$ , C) radio-HPLC chromatogram of  $[^{111}\text{In}]\text{In-BQ7857}$  demonstrating pure product.

BQ7858

A)

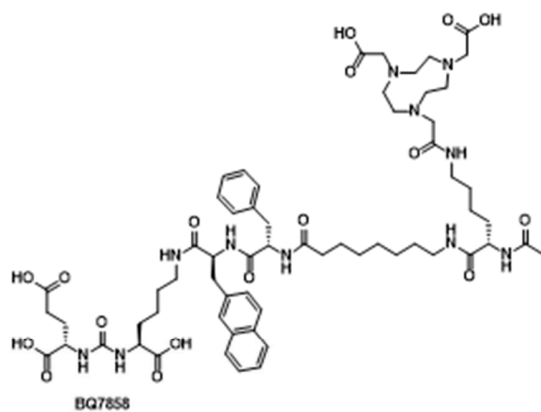

B)

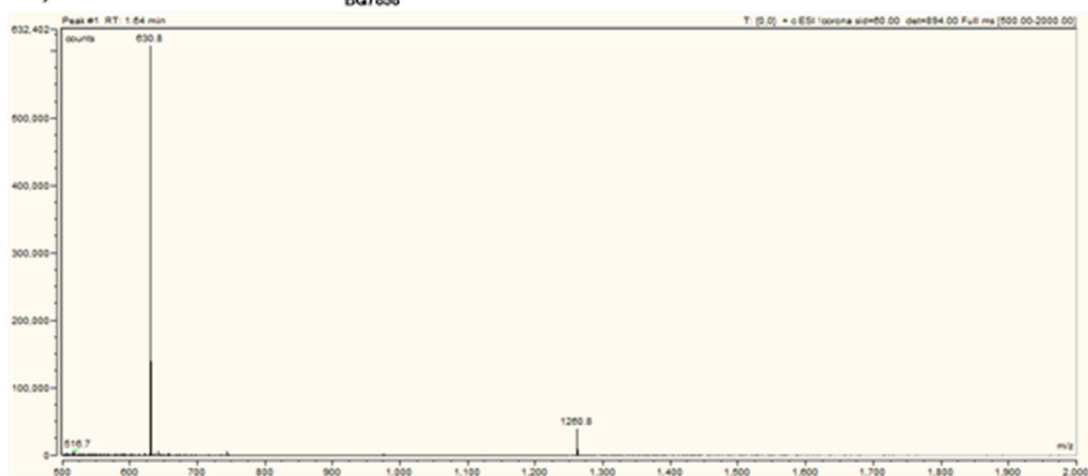

C)

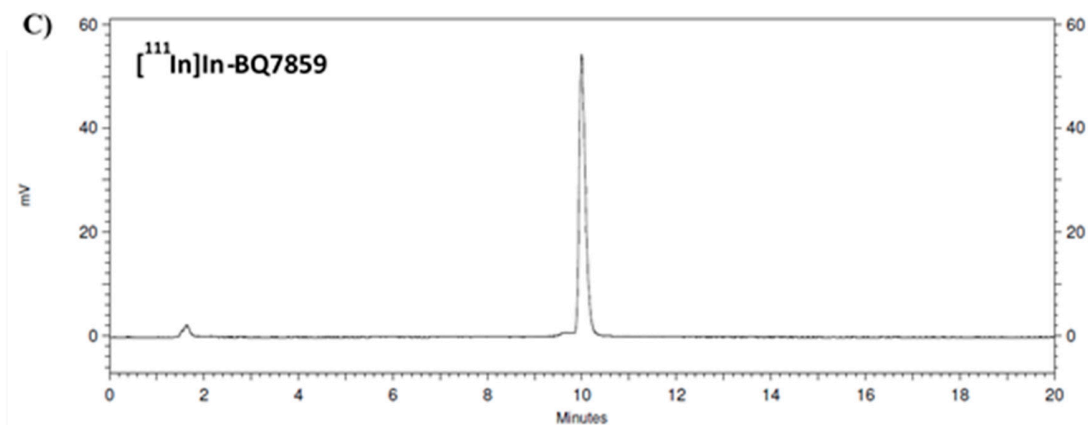

Figure S8. A) Chemical structure of BQ7858, B) MS-chromatogram with observed  $[M+H]^+ = 1260.80$  and  $[M+2H]^{2+} = 630.8$ , C) radio-HPLC chromatogram of  $[^{111}\text{In}]\text{In-BQ7858}$  demonstrating pure product.



BQ7859

A)

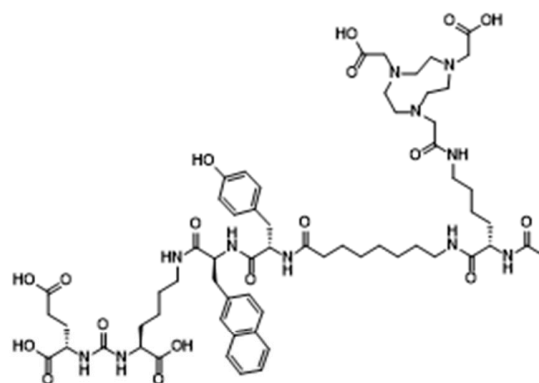

B)

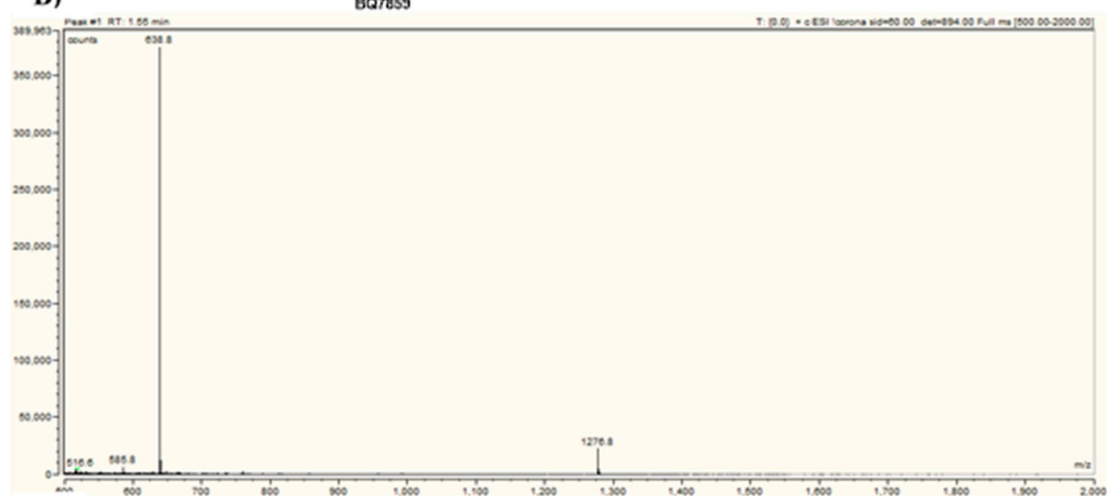

C)

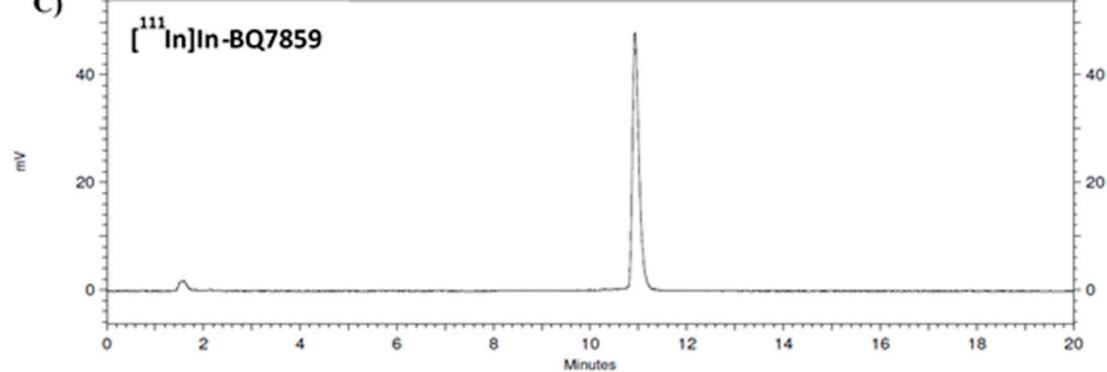

Figure S9. A) Chemical structure of BQ7859, B) MS-chromatogram with observed  $[M+H]^+ = 1276.8$  and  $[M+2H]^{2+} = 638.8$ , C) radio-HPLC chromatogram of  $[^{111}\text{In}]\text{In-BQ7859}$  demonstrating pure product.

BQ7860

A)

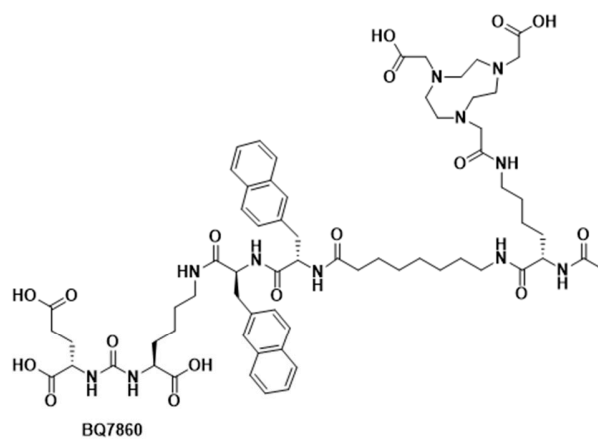

B)

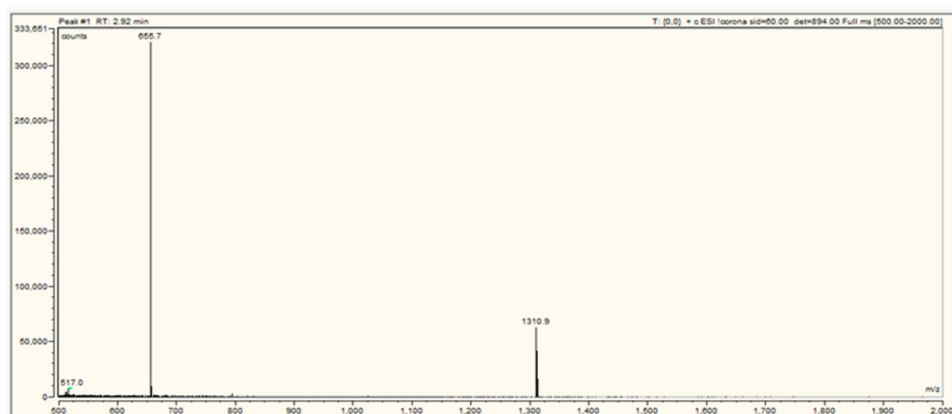

C)

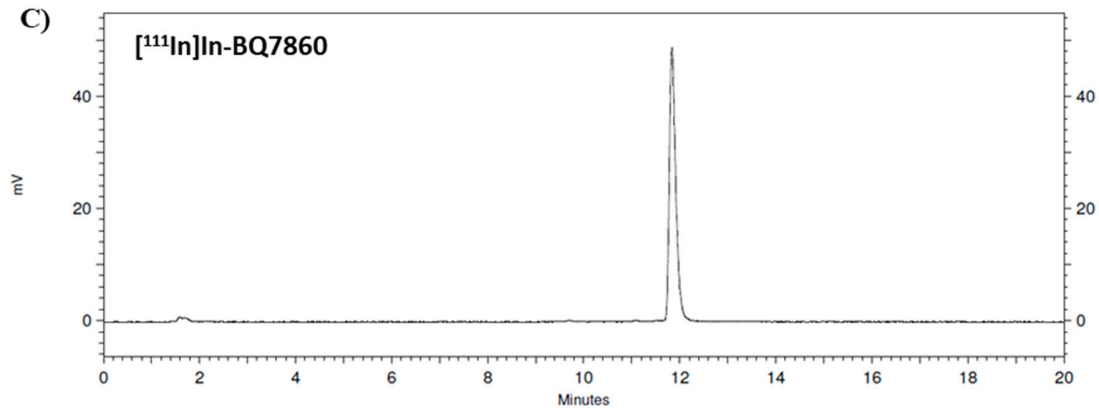

Figure S10. A) Chemical structure of BQ7860, B) MS-chromatogram with observed  $[M+H]^+ = 1310.9$  and  $[M+2H]^{2+} = 656.1$ , C) radio-HPLC chromatogram of  $[^{111}\text{In}]\text{In-BQ7860}$  demonstrating pure product.

BQ7861

A)

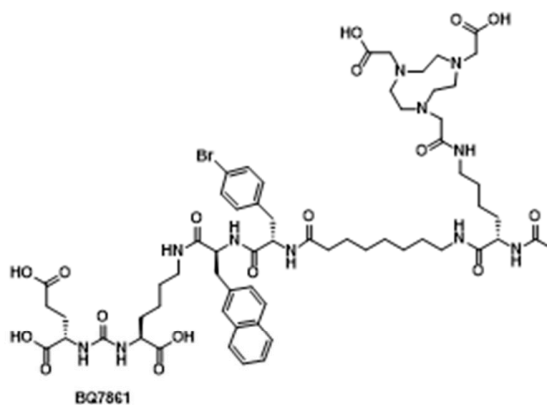

B)

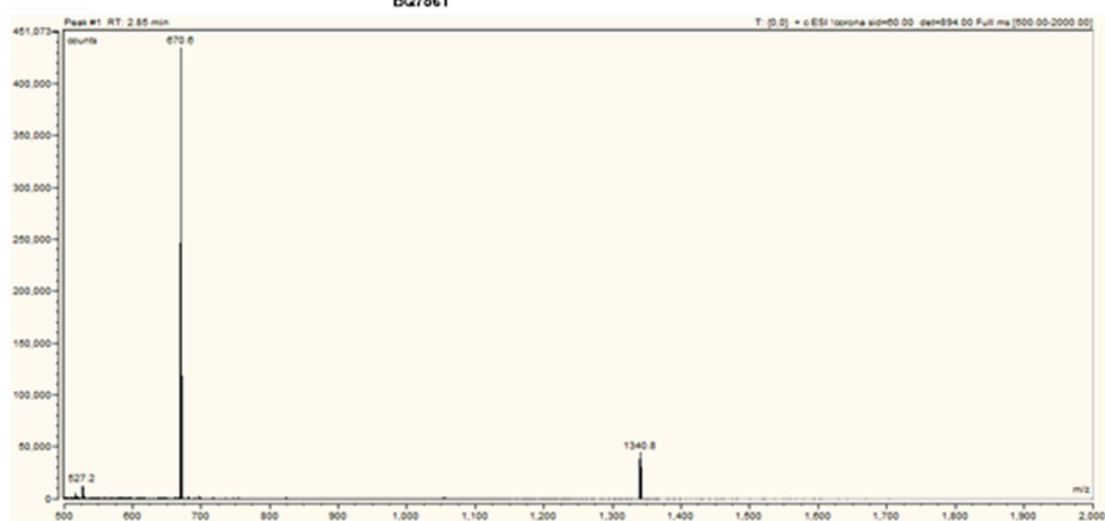

C)

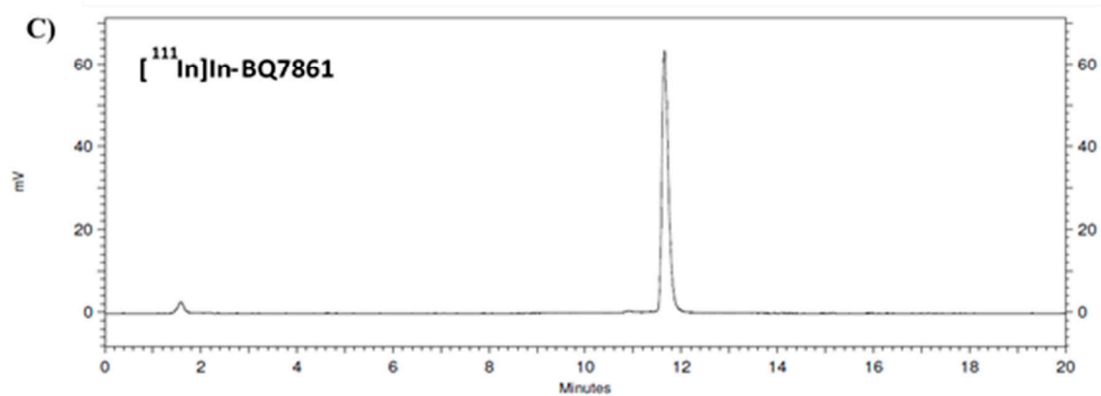

Figure S11. A) Chemical structure of BQ7861, B) MS-chromatogram with observed  $[M+H]^+ = 1340.8$  and  $[M+2H]^{2+} = 670.6$ , C) radio-HPLC chromatogram of  $[^{111}\text{In}]\text{In-BQ7861}$  demonstrating pure product.

BQ7862

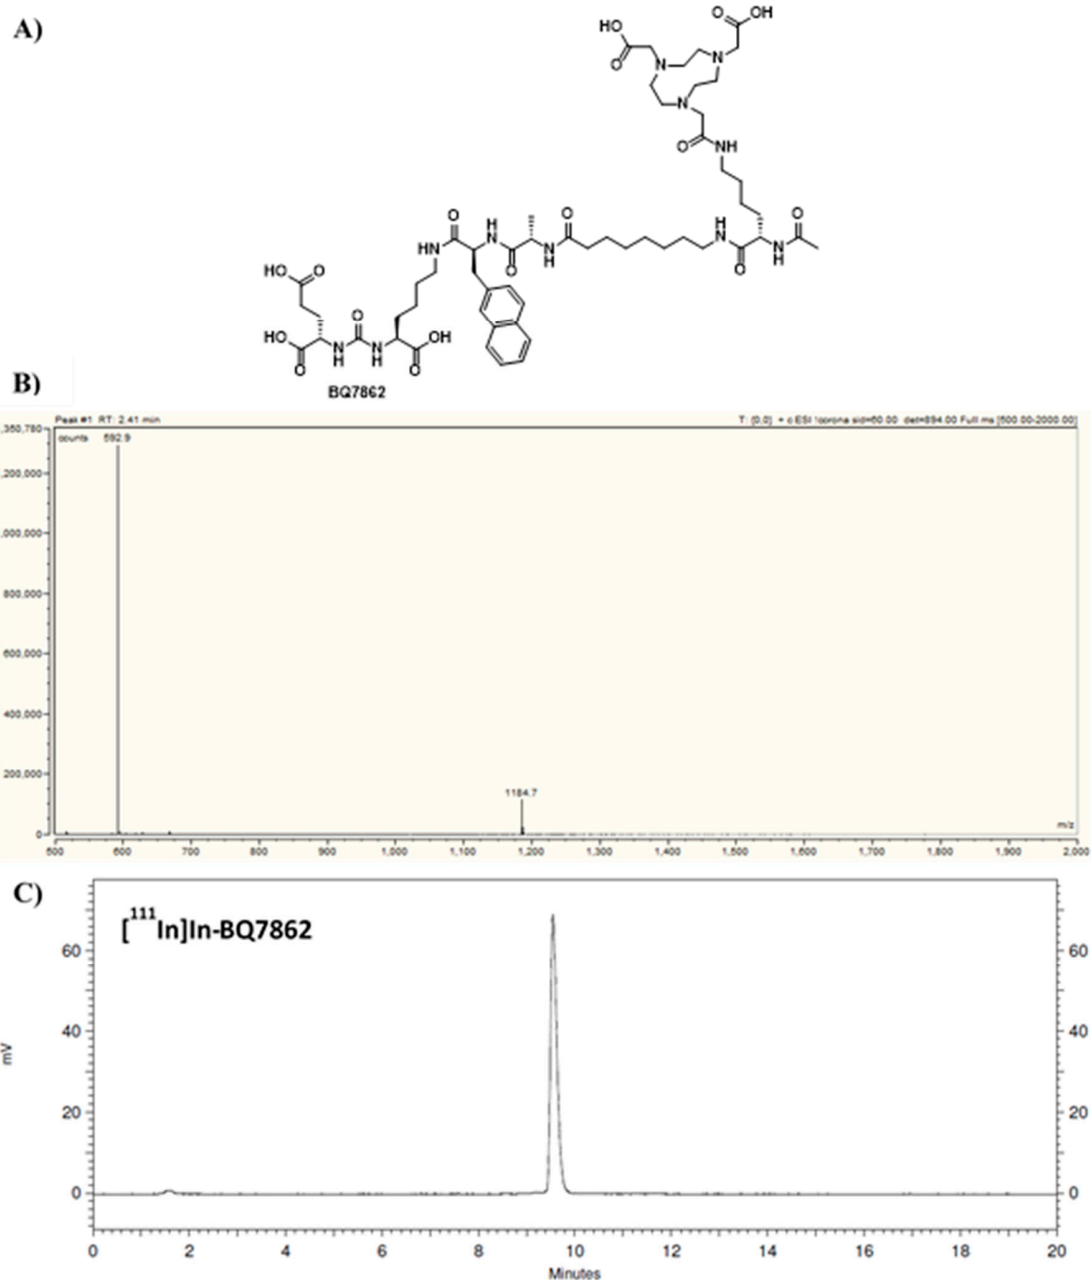

Figure S12. A) Chemical structure of BQ7862, B) MS-chromatogram with observed  $[M+H]^+ = 1184.7$  and  $[M+2H]^{2+} = 592.9$ , C) radio-HPLC chromatogram of  $[^{111}\text{In}]\text{In-BQ7862}$  demonstrating pure product.

## In vivo biodistribution

Table S1. In vivo biodistribution of [<sup>111</sup>In]In-BQ7857-61 (40 pmol/animal, 30 kBq) in BALB/c nu/nu PC3-pip xenografted tumour bearing mice at 1 h pi. Uptake of activity was calculated as percent injected dose per tissue weight (% ID/g). Data are presented as average ± standard deviation.

| Organ           | % ID/g 1h pi.                 |                               |                               |                               |                               |
|-----------------|-------------------------------|-------------------------------|-------------------------------|-------------------------------|-------------------------------|
|                 | [ <sup>111</sup> In]In-BQ7857 | [ <sup>111</sup> In]In-BQ7858 | [ <sup>111</sup> In]In-BQ7859 | [ <sup>111</sup> In]In-BQ7860 | [ <sup>111</sup> In]In-BQ7861 |
| Blood           | 4.28 ± 0.65                   | 5.04 ± 1.00                   | 3.16 ± 1.73                   | 12.0 ± 1.19                   | 9.18 ± 1.80                   |
| Salivary glands | 3.18 ± 1.07                   | 3.10 ± 0.56                   | 3.09 ± 1.21                   | 5.83 ± 1.09                   | 3.97 ± 1.84                   |
| Lungs           | 4.32 ± 1.21                   | 5.13 ± 2.47                   | 3.20 ± 1.07                   | 7.76 ± 1.22                   | 5.60 ± 1.02                   |
| Liver           | 1.40 ± 0.30                   | 1.65 ± 0.35                   | 1.38 ± 0.72                   | 5.83 ± 0.73                   | 3.42 ± 0.75                   |
| Spleen          | 13.3 ± 5.27                   | 14.4 ± 1.48                   | 16.3 ± 3.05                   | 22.3 ± 7.63                   | 19.3 ± 8.48                   |
| Large intestine | 1.16 ± 0.23                   | 1.38 ± 0.28                   | 1.10 ± 0.49                   | 3.40 ± 0.27                   | 1.99 ± 0.31                   |
| Kidneys         | 194.3 ± 31.8                  | 141.5 ± 19.4                  | 182.8 ± 49.5                  | 153.5 ± 27.0                  | 131.0 ± 17.0                  |
| Tumour          | 8.97 ± 2.91                   | 10.6 ± 1.73                   | 10.4 ± 1.78                   | 9.75 ± 1.05                   | 8.98 ± 2.56                   |
| Muscle          | 0.82 ± 2.91                   | 0.95 ± 0.25                   | 0.74 ± 0.33                   | 1.61 ± 0.31                   | 1.24 ± 0.16                   |
| Bone            | 1.27 ± 0.39                   | 1.24 ± 0.20                   | 1.08 ± 0.29                   | 2.54 ± 0.53                   | 2.09 ± 0.20                   |
| GI              | 2.74 ± 0.41                   | 2.67 ± 0.03                   | 1.80 ± 0.43                   | 4.97 ± 1.23                   | 4.20 ± 0.32                   |
| Body            | 14.2 ± 1.14                   | 17.2 ± 3.29                   | 14.1 ± 5.49                   | 32.3 ± 4.29                   | 26.9 ± 6.73                   |

Table S2. In vivo biodistribution of [<sup>111</sup>In]In-BQ7857 and [<sup>111</sup>In]In-BQ7859 (40 pmol/animal, 30 kBq) in BALB/c nu/nu PC3-pip xenografted tumour bearing mice at 24 h pi. To the left; Uptake of activity was calculated as percent injected dose per tissue weight (% ID/g), to the right; tumour-to-organ ratios at 24 h pi. Data are presented as average ± standard deviation.

| Organ           | % ID/g 24h pi.                |                               | T/O                           |                               |
|-----------------|-------------------------------|-------------------------------|-------------------------------|-------------------------------|
|                 | [ <sup>111</sup> In]In-BQ7857 | [ <sup>111</sup> In]In-BQ7859 | [ <sup>111</sup> In]In-BQ7857 | [ <sup>111</sup> In]In-BQ7859 |
| Blood           | 0.041 ± 0.009                 | 0.04 ± 0.02                   | 110.8 ± 1.0                   | 247.2 ± 45.6                  |
| Salivary glands | 0.13 ± 0.04                   | 0.17 ± 0.06                   | 51.0 ± 28.1                   | 58.3 ± 16.6                   |
| Lungs           | 0.10 ± 0.01                   | 0.13 ± 0.004                  | 57.5 ± 29.7                   | 79.9 ± 15.3                   |
| Liver           | 0.27 ± 0.03                   | 0.37 ± 0.08                   | 21.5 ± 8.73                   | 25.0 ± 7.50                   |
| Spleen          | 0.30 ± 0.04                   | 0.56 ± 0.18                   | 18.7 ± 7.00                   | 16.5 ± 2.14                   |
| Large intestine | 0.08 ± 0.009                  | 0.07 ± 0.01                   | 74.7 ± 25.4                   | 113.6 ± 19.9                  |
| Kidneys         | 12.5 ± 2.02                   | 30.3 ± 11.6                   | 0.48 ± 0.28                   | 0.32 ± 0.10                   |
| Tumour          | 5.73 ± 2.50                   | 9.00 ± 2.58                   | 1                             | 1                             |
| Muscle          | 0.03 ± 0.005                  | 0.06 ± 0.03                   | 168.5 ± 51.0                  | 167.2 ± 28.3                  |
| Bone            | 0.10 ± 0.01                   | 0.09 ± 0.02                   | 57.0 ± 19.0                   | 102.3 ± 38.3                  |
| GI              | 0.23 ± 0.06                   | 1.78 ± 2.44                   |                               |                               |
| Body            | 0.96 ± 0.19                   | 1.24 ± 0.52                   |                               |                               |
